# Supplementary material
Source: publisher figshare collection journal article supplement (https://acs.figshare.com/ndownloader/files/5065978)
Supplement: Supplementary file 1 [file 5065978]

ATOM      1  N   5HP A   1      26.377  31.517  28.683  1.00  0.00             
ATOM      2  CA  5HP A   1      26.559  30.338  27.746  1.00  0.00             
ATOM      3  C   5HP A   1      26.965  29.081  28.528  1.00  0.00             
ATOM      4  O   5HP A   1      27.079  29.105  29.738  1.00  0.00             
ATOM      5  CB  5HP A   1      27.679  30.771  26.786  1.00  0.00             
ATOM      6  CG  5HP A   1      27.899  32.243  27.042  1.00  0.00             
ATOM      7  CD  5HP A   1      26.948  32.574  28.171  1.00  0.00             
ATOM      8  OD  5HP A   1      26.491  33.695  28.277  1.00  0.00             
ATOM      9  H   5HP A   1      25.371  31.718  28.804  1.00  0.00             
ATOM     10  N   ARG A   2      27.176  27.983  27.842  1.00  0.00             
ATOM     11  CA  ARG A   2      27.567  26.715  28.538  1.00  0.00             
ATOM     12  C   ARG A   2      28.249  25.761  27.541  1.00  0.00             
ATOM     13  O   ARG A   2      29.442  25.536  27.608  1.00  0.00             
ATOM     14  CB  ARG A   2      26.239  26.149  29.066  1.00  0.00             
ATOM     15  CG  ARG A   2      26.346  24.646  29.360  1.00  0.00             
ATOM     16  CD  ARG A   2      25.101  24.191  30.134  1.00  0.00             
ATOM     17  NE  ARG A   2      25.541  24.100  31.559  1.00  0.00             
ATOM     18  CZ  ARG A   2      25.301  25.082  32.384  1.00  0.00             
ATOM     19  NH1 ARG A   2      24.071  25.384  32.692  1.00  0.00             
ATOM     20  NH2 ARG A   2      26.293  25.755  32.899  1.00  0.00             
ATOM     21  N   CYS A   3      27.509  25.203  26.610  1.00  0.00             
ATOM     22  CA  CYS A   3      28.135  24.266  25.614  1.00  0.00             
ATOM     23  C   CYS A   3      28.874  25.050  24.518  1.00  0.00             
ATOM     24  O   CYS A   3      28.650  24.838  23.344  1.00  0.00             
ATOM     25  CB  CYS A   3      26.981  23.460  24.991  1.00  0.00             
ATOM     26  SG  CYS A   3      25.822  22.906  26.267  1.00  0.00             
ATOM     27  N   CYS A   4      29.758  25.946  24.881  1.00  0.00             
ATOM     28  CA  CYS A   4      30.507  26.725  23.839  1.00  0.00             
ATOM     29  C   CYS A   4      31.905  27.113  24.337  1.00  0.00             
ATOM     30  O   CYS A   4      32.483  28.081  23.888  1.00  0.00             
ATOM     31  CB  CYS A   4      29.675  27.980  23.586  1.00  0.00             
ATOM     32  SG  CYS A   4      28.206  27.556  22.606  1.00  0.00             
ATOM     33  N   ASN A   5      32.451  26.364  25.258  1.00  0.00             
ATOM     34  CA  ASN A   5      33.816  26.682  25.783  1.00  0.00             
ATOM     35  C   ASN A   5      34.782  25.534  25.466  1.00  0.00             
ATOM     36  O   ASN A   5      35.734  25.287  26.187  1.00  0.00             
ATOM     37  CB  ASN A   5      33.640  26.837  27.299  1.00  0.00             
ATOM     38  CG  ASN A   5      34.002  28.263  27.715  1.00  0.00             
ATOM     39  OD1 ASN A   5      33.335  29.204  27.340  1.00  0.00             
ATOM     40  ND2 ASN A   5      35.033  28.464  28.482  1.00  0.00             
ATOM     41  N   GLY A   6      34.543  24.840  24.388  1.00  0.00             
ATOM     42  CA  GLY A   6      35.430  23.708  23.997  1.00  0.00             
ATOM     43  C   GLY A   6      35.039  23.236  22.597  1.00  0.00             
ATOM     44  O   GLY A   6      34.391  23.949  21.856  1.00  0.00             
ATOM     45  N   ARG A   7      35.413  22.037  22.233  1.00  0.00             
ATOM     46  CA  ARG A   7      35.052  21.519  20.872  1.00  0.00             
ATOM     47  C   ARG A   7      33.777  20.654  20.917  1.00  0.00             
ATOM     48  O   ARG A   7      33.484  19.928  19.983  1.00  0.00             
ATOM     49  CB  ARG A   7      36.264  20.696  20.407  1.00  0.00             
ATOM     50  CG  ARG A   7      36.510  19.516  21.354  1.00  0.00             
ATOM     51  CD  ARG A   7      37.779  18.772  20.921  1.00  0.00             
ATOM     52  NE  ARG A   7      37.370  17.954  19.741  1.00  0.00             
ATOM     53  CZ  ARG A   7      38.091  17.967  18.652  1.00  0.00             
ATOM     54  NH1 ARG A   7      39.298  17.469  18.668  1.00  0.00             
ATOM     55  NH2 ARG A   7      37.600  18.480  17.556  1.00  0.00             
ATOM     56  N   ARG A   8      33.009  20.730  21.979  1.00  0.00             
ATOM     57  CA  ARG A   8      31.756  19.918  22.057  1.00  0.00             
ATOM     58  C   ARG A   8      30.606  20.671  21.366  1.00  0.00             
ATOM     59  O   ARG A   8      30.263  20.398  20.233  1.00  0.00             
ATOM     60  CB  ARG A   8      31.477  19.739  23.557  1.00  0.00             
ATOM     61  CG  ARG A   8      32.467  18.735  24.159  1.00  0.00             
ATOM     62  CD  ARG A   8      32.197  18.590  25.663  1.00  0.00             
ATOM     63  NE  ARG A   8      32.814  17.291  26.058  1.00  0.00             
ATOM     64  CZ  ARG A   8      32.946  16.986  27.323  1.00  0.00             
ATOM     65  NH1 ARG A   8      33.983  17.409  28.001  1.00  0.00             
ATOM     66  NH2 ARG A   8      32.027  16.272  27.905  1.00  0.00             
ATOM     67  N   GLY A   9      30.007  21.622  22.038  1.00  0.00             
ATOM     68  CA  GLY A   9      28.891  22.397  21.421  1.00  0.00             
ATOM     69  C   GLY A   9      27.567  21.678  21.660  1.00  0.00             
ATOM     70  O   GLY A   9      26.700  22.161  22.363  1.00  0.00             
ATOM     71  N   CYS A  10      27.415  20.521  21.087  1.00  0.00             
ATOM     72  CA  CYS A  10      26.157  19.739  21.265  1.00  0.00             
ATOM     73  C   CYS A  10      26.420  18.601  22.242  1.00  0.00             
ATOM     74  O   CYS A  10      26.622  17.463  21.870  1.00  0.00             
ATOM     75  CB  CYS A  10      25.815  19.198  19.875  1.00  0.00             
ATOM     76  SG  CYS A  10      25.613  20.577  18.717  1.00  0.00             
ATOM     77  N   SER A  11      26.439  18.923  23.497  1.00  0.00             
ATOM     78  CA  SER A  11      26.716  17.895  24.548  1.00  0.00             
ATOM     79  C   SER A  11      25.418  17.165  24.944  1.00  0.00             
ATOM     80  O   SER A  11      25.442  16.002  25.305  1.00  0.00             
ATOM     81  CB  SER A  11      27.267  18.705  25.732  1.00  0.00             
ATOM     82  OG  SER A  11      28.420  19.442  25.314  1.00  0.00             
ATOM     83  N   SER A  12      24.288  17.820  24.869  1.00  0.00             
ATOM     84  CA  SER A  12      23.010  17.130  25.231  1.00  0.00             
ATOM     85  C   SER A  12      21.840  17.730  24.433  1.00  0.00             
ATOM     86  O   SER A  12      22.003  18.137  23.297  1.00  0.00             
ATOM     87  CB  SER A  12      22.853  17.412  26.729  1.00  0.00             
ATOM     88  OG  SER A  12      21.674  16.790  27.213  1.00  0.00             
ATOM     89  N   ARG A  13      20.680  17.820  25.031  1.00  0.00             
ATOM     90  CA  ARG A  13      19.506  18.424  24.337  1.00  0.00             
ATOM     91  C   ARG A  13      19.374  19.895  24.750  1.00  0.00             
ATOM     92  O   ARG A  13      18.589  20.633  24.194  1.00  0.00             
ATOM     93  CB  ARG A  13      18.287  17.619  24.810  1.00  0.00             
ATOM     94  CG  ARG A  13      18.355  16.191  24.251  1.00  0.00             
ATOM     95  CD  ARG A  13      17.143  15.931  23.345  1.00  0.00             
ATOM     96  NE  ARG A  13      17.403  16.736  22.110  1.00  0.00             
ATOM     97  CZ  ARG A  13      17.681  16.133  20.986  1.00  0.00             
ATOM     98  NH1 ARG A  13      16.707  15.697  20.237  1.00  0.00             
ATOM     99  NH2 ARG A  13      18.922  15.972  20.618  1.00  0.00             
ATOM    100  N   TRP A  14      20.144  20.313  25.728  1.00  0.00             
ATOM    101  CA  TRP A  14      20.099  21.726  26.200  1.00  0.00             
ATOM    102  C   TRP A  14      20.983  22.619  25.334  1.00  0.00             
ATOM    103  O   TRP A  14      20.795  23.797  25.272  1.00  0.00             
ATOM    104  CB  TRP A  14      20.662  21.671  27.618  1.00  0.00             
ATOM    105  CG  TRP A  14      20.771  23.057  28.167  1.00  0.00             
ATOM    106  CD1 TRP A  14      19.896  23.607  29.011  1.00  0.00             
ATOM    107  CD2 TRP A  14      21.774  24.078  27.902  1.00  0.00             
ATOM    108  NE1 TRP A  14      20.301  24.895  29.312  1.00  0.00             
ATOM    109  CE2 TRP A  14      21.458  25.231  28.652  1.00  0.00             
ATOM    110  CE3 TRP A  14      22.921  24.107  27.106  1.00  0.00             
ATOM    111  CZ2 TRP A  14      22.250  26.380  28.606  1.00  0.00             
ATOM    112  CZ3 TRP A  14      23.717  25.250  27.050  1.00  0.00             
ATOM    113  CH2 TRP A  14      23.389  26.387  27.803  1.00  0.00             
ATOM    114  N   CYS A  15      21.968  22.097  24.681  1.00  0.00             
ATOM    115  CA  CYS A  15      22.829  23.020  23.892  1.00  0.00             
ATOM    116  C   CYS A  15      22.215  23.290  22.520  1.00  0.00             
ATOM    117  O   CYS A  15      22.779  22.962  21.497  1.00  0.00             
ATOM    118  CB  CYS A  15      24.192  22.325  23.757  1.00  0.00             
ATOM    119  SG  CYS A  15      24.658  21.542  25.330  1.00  0.00             
ATOM    120  N   ARG A  16      21.065  23.914  22.503  1.00  0.00             
ATOM    121  CA  ARG A  16      20.394  24.248  21.213  1.00  0.00             
ATOM    122  C   ARG A  16      19.918  25.713  21.244  1.00  0.00             
ATOM    123  O   ARG A  16      20.348  26.522  20.449  1.00  0.00             
ATOM    124  CB  ARG A  16      19.192  23.293  21.099  1.00  0.00             
ATOM    125  CG  ARG A  16      19.581  21.869  21.528  1.00  0.00             
ATOM    126  CD  ARG A  16      18.500  20.880  21.062  1.00  0.00             
ATOM    127  NE  ARG A  16      18.970  20.370  19.736  1.00  0.00             
ATOM    128  CZ  ARG A  16      18.169  20.399  18.698  1.00  0.00             
ATOM    129  NH1 ARG A  16      17.553  21.507  18.380  1.00  0.00             
ATOM    130  NH2 ARG A  16      17.995  19.324  17.982  1.00  0.00             
ATOM    131  N   ASP A  17      19.036  26.054  22.160  1.00  0.00             
ATOM    132  CA  ASP A  17      18.523  27.468  22.240  1.00  0.00             
ATOM    133  C   ASP A  17      19.323  28.312  23.241  1.00  0.00             
ATOM    134  O   ASP A  17      18.877  29.362  23.667  1.00  0.00             
ATOM    135  CB  ASP A  17      17.078  27.339  22.737  1.00  0.00             
ATOM    136  CG  ASP A  17      16.116  27.380  21.558  1.00  0.00             
ATOM    137  OD1 ASP A  17      15.495  28.407  21.364  1.00  0.00             
ATOM    138  OD2 ASP A  17      16.011  26.386  20.869  1.00  0.00             
ATOM    139  N   HIS A  18      20.485  27.871  23.623  1.00  0.00             
ATOM    140  CA  HIS A  18      21.297  28.653  24.606  1.00  0.00             
ATOM    141  C   HIS A  18      22.727  28.806  24.081  1.00  0.00             
ATOM    142  O   HIS A  18      23.286  29.885  24.063  1.00  0.00             
ATOM    143  CB  HIS A  18      21.318  27.849  25.935  1.00  0.00             
ATOM    144  CG  HIS A  18      20.100  26.965  26.114  1.00  0.00             
ATOM    145  ND1 HIS A  18      19.781  25.952  25.235  1.00  0.00             
ATOM    146  CD2 HIS A  18      19.154  26.894  27.104  1.00  0.00             
ATOM    147  CE1 HIS A  18      18.693  25.327  25.706  1.00  0.00             
ATOM    148  NE2 HIS A  18      18.265  25.862  26.843  1.00  0.00             
ATOM    149  N   SER A  19      23.324  27.724  23.660  1.00  0.00             
ATOM    150  CA  SER A  19      24.718  27.780  23.139  1.00  0.00             
ATOM    151  C   SER A  19      24.703  27.923  21.617  1.00  0.00             
ATOM    152  O   SER A  19      24.350  26.993  20.910  1.00  0.00             
ATOM    153  CB  SER A  19      25.348  26.437  23.543  1.00  0.00             
ATOM    154  OG  SER A  19      24.396  25.389  23.371  1.00  0.00             
ATOM    155  N   ARG A  20      25.091  29.063  21.102  1.00  0.00             
ATOM    156  CA  ARG A  20      25.112  29.249  19.614  1.00  0.00             
ATOM    157  C   ARG A  20      26.273  28.447  19.003  1.00  0.00             
ATOM    158  O   ARG A  20      27.088  28.969  18.264  1.00  0.00             
ATOM    159  CB  ARG A  20      25.313  30.752  19.384  1.00  0.00             
ATOM    160  CG  ARG A  20      23.989  31.387  18.945  1.00  0.00             
ATOM    161  CD  ARG A  20      24.039  31.715  17.446  1.00  0.00             
ATOM    162  NE  ARG A  20      23.942  33.201  17.368  1.00  0.00             
ATOM    163  CZ  ARG A  20      25.012  33.923  17.207  1.00  0.00             
ATOM    164  NH1 ARG A  20      25.536  34.046  16.020  1.00  0.00             
ATOM    165  NH2 ARG A  20      25.559  34.509  18.233  1.00  0.00             
ATOM    166  N   CYS A  21      26.344  27.181  19.314  1.00  0.00             
ATOM    167  CA  CYS A  21      27.425  26.310  18.772  1.00  0.00             
ATOM    168  C   CYS A  21      26.838  24.930  18.445  1.00  0.00             
ATOM    169  O   CYS A  21      27.438  23.910  18.720  1.00  0.00             
ATOM    170  CB  CYS A  21      28.468  26.184  19.898  1.00  0.00             
ATOM    171  SG  CYS A  21      28.777  27.797  20.678  1.00  0.00             
ATOM    172  N   CYS A  22      25.659  24.897  17.874  1.00  0.00             
ATOM    173  CA  CYS A  22      25.009  23.593  17.534  1.00  0.00             
ATOM    174  C   CYS A  22      24.116  23.758  16.291  1.00  0.00             
ATOM    175  O   CYS A  22      23.023  23.214  16.280  1.00  0.00             
ATOM    176  CB  CYS A  22      24.163  23.240  18.767  1.00  0.00             
ATOM    177  SG  CYS A  22      25.097  22.155  19.871  1.00  0.00             
ATOM    178  N   NH2 A  23      24.539  24.429  15.369  1.00  0.00             
TER
